# Supplementary material for: Aberration in myeloid-derived pro-angiogenic cells in type-2 diabetes mellitus; implication for diabetic retinopathy?
Source: PubMed Central journal article supplement (PMC11182312; doi:10.3389/fopht.2023.1119050), 2023-03-23
Supplement: Table_1.pdf [file Table_1.pdf]

**Table S1**

| <b>Surface markers</b> | <b>Molecular identity</b>                                     | <b>Indication</b>                                                   |
|------------------------|---------------------------------------------------------------|---------------------------------------------------------------------|
| <b>CD14</b>            | LPS co-receptor                                               | Monocyte/macrophage (M1) marker                                     |
| <b>CD16</b>            | FcγRIII                                                       | Monocyte/macrophage marker<br>(↑ expression by M2-like stimulation) |
| <b>CD105</b>           | Endoglin                                                      | Endothelial cell marker                                             |
| <b>CD133</b>           | Prominin-1                                                    | Stem cell marker                                                    |
| <b>CD31</b>            | PECAM-1                                                       | Endothelial cell marker                                             |
| <b>HLA-DR</b>          | MHC-II                                                        | Antigen presenting cells activation<br>marker                       |
| <b>CD163</b>           | scavenger receptor for the hemoglobin-<br>haptoglobin complex | Alternatively activated macrophages<br>marker                       |
| <b>CD206</b>           | Mannose receptor                                              | Alternatively activated macrophages<br>marker                       |
